# Supplementary material for: A High-Quality Chromosome-Level Assembly Genome Provides Insights into Wing Dimorphism and Xenobiotic Detoxification in Metopolophium Dirhodum (Walker)
Source: Research Square preprint supplement (doi:10.21203/rs.3.rs-1299497/v1), 2022-02-07
Supplement: Supplementary file 1 [file ad1299eb9fd1c056b583a1ff.xlsx]

## Sheet: Sheet1
Table S2: Overview of chromosome length of M. dirhodum assembly
chromosome	chromosome length (bp)
Chr1	160037049
Chr2	44416729
Chr3	41762923
Chr4	40071662
Chr5	39359500
Chr6	39321500
Chr7	38521574
Chr8	36722967
Chr9	33431937
Total	473,645,841 (98.50%)
