# Supplementary material for: A High-Quality Chromosome-Level Assembly Genome Provides Insights into Wing Dimorphism and Xenobiotic Detoxification in Metopolophium Dirhodum (Walker)
Source: Research Square preprint supplement (doi:10.21203/rs.3.rs-1299497/v1), 2022-02-07
Supplement: Supplementary file 2 [file c845f5c4b59456d15401665d.xlsx]

## Sheet: Sheet1
Table S6: DEGs potential related to wing dimorphism between wingless and winged adults
Gene	Annotation	log2FoldChange	Padj
		（Wingless A/Winged A）
Chr04.g10601	ecdysone receptor	3.12	5.72e-60
Chr02.g06891	nuclear hormone receptor FTZ-F1	3.57	3.28e-77
Chr02.g07298	juvenile hormone epoxide hydrolase	4.77	3.57e-147
Chr09.g17417	protein ecdysoneless	-2.25	3.67e-52
Chr02.g07445	zinc finger protein on ecdysone puffs-like	-3.75	1.92e-114
Chr01.g01845	ultraspiracle	2.24	3.84e-31
Chr01.g01997	protein Wnt-1	2.26	4.1e-16
Chr04.g10214	forkhead box protein O	4.03	1.19e-124
Chr01.g04814	protein decapentaplegic-like	2.36	4.45e-10
Chr04.g09868	mothers against decapentaplegic homolog 6	2.9	3.95e-44
Chr07.g15090	protein decapentaplegic	3.47	4.25e-17
Chr01.g02625	homeotic protein distal-less-like	2.2	3.48e-47
Chr02.g07276	homeotic protein ultrabithorax	2.74	2.36e-43
Chr03.g08746	serum response factor-binding protein 1	-3.92	2.04e-145
